# Supplementary material for: Fluorescent, online monitoring of PLGA degradation for regenerative medicine applications
Source: Royal Society of Chemistry journal article supplement (doi:10.1039/c6ra04690h), 2016-01-01
Supplement: c6ra04690h1.pdf [file c6ra04690h1.pdf]

## Supplementary Data

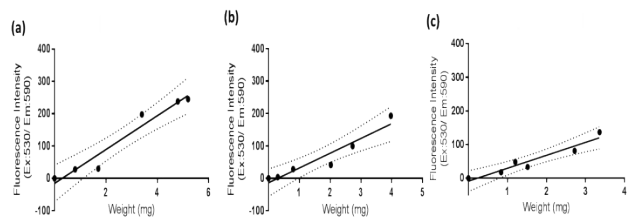

**Supplementary data 1.** Calibration curves showing weight (mg) to fluorescence emission (Ex:530/Em:590) for varying PLGA compositions; (b) 50/50, (c) 65/35 and (d) 80/20.
